# Supplementary material for: Differential DNase I hypersensitivity reveals factor-dependent chromatin dynamics
Source: HighWire-hosted journal article supplement (doi:10.1101/gr.133280.111), 2012-04-16
Supplement: MS133280_supp.pdf [file MS133280_supp.pdf]

## Supporting online material for

### Differential DNase I Hypersensitivity Reveals Factor-dependent Chromatin Dynamics

Housheng Hansen He<sup>§</sup>, Clifford A Meyer<sup>§</sup>, Mei Wei Chen, V. Craig Jordan, Myles Brown<sup>\*</sup>, X. Shirley Liu<sup>\*</sup>

<sup>§</sup> These authors contributed equally

<sup>\*</sup> To whom correspondence should be addressed. Email: [Myles\\_Brown@dfci.harvard.edu](mailto:Myles_Brown@dfci.harvard.edu), [xsliu@jimmy.harvard.edu](mailto:xsliu@jimmy.harvard.edu)

## Supplemental Figures

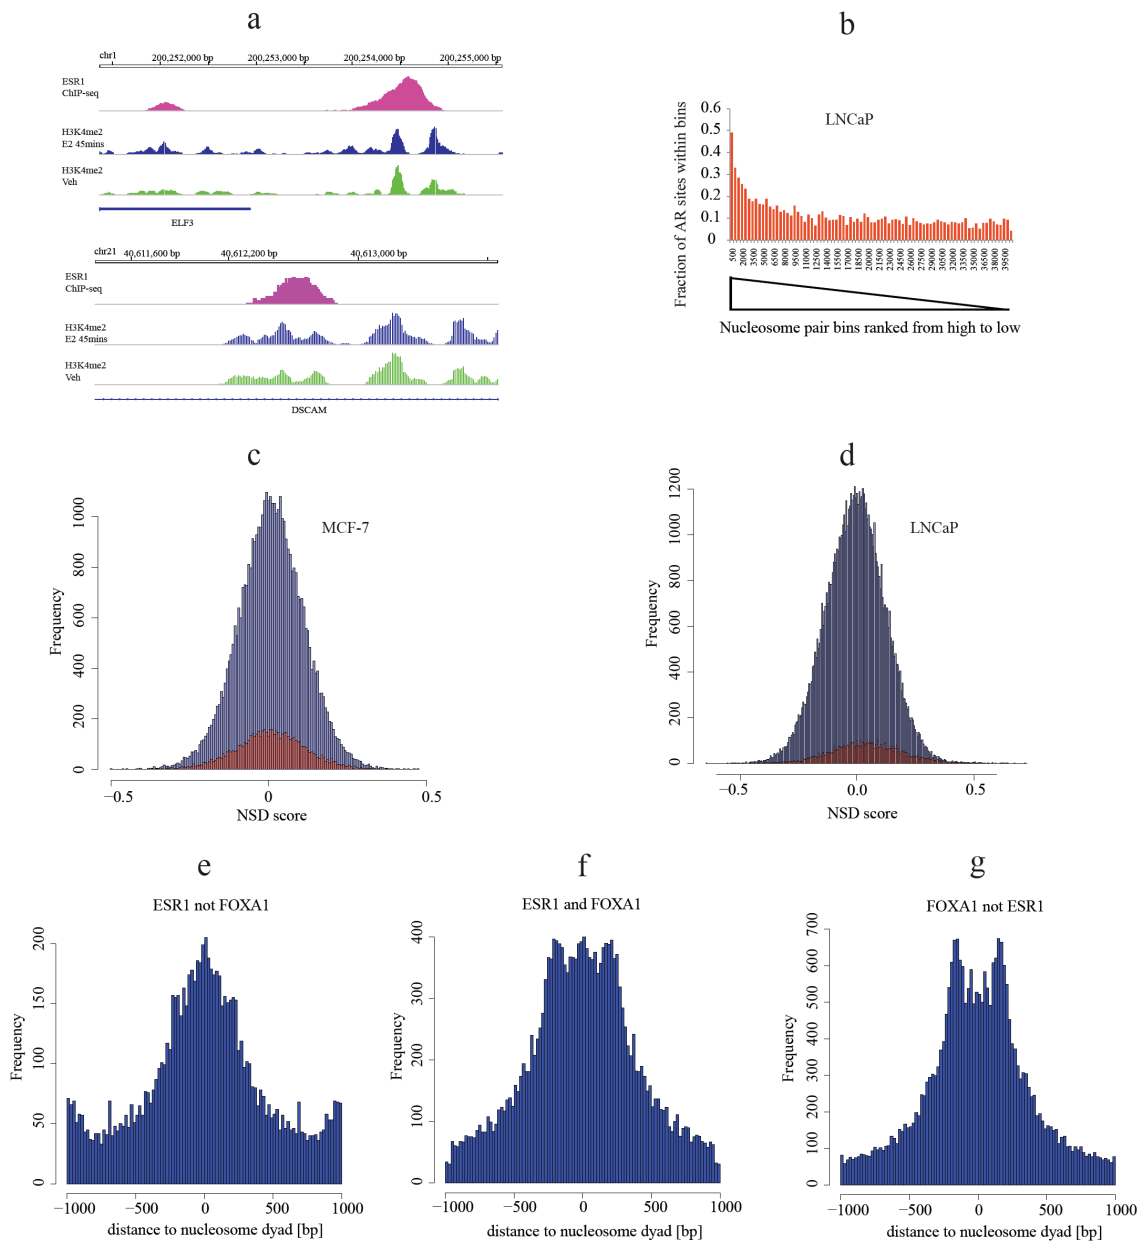

**Supplemental Figure 1. ESR1 and AR binding and nucleosome occupancy.** Instances of ESR1 binding located at depleted H3K4me2 regions near ESR1 regulated genes **(a)** ELF3 and DSCAM. **(b)** The fraction of AR binding sites in paired nucleosome bins sorted in descending order by NSD score (stimulated vs. unstimulated). Paired nucleosome regions are ranked by scores that represent the differences in the H3K4me2 tag counts before and after estrogen treatment. To calculate the proportion of real binding sites as a function of rank, these ranked regions are grouped into bins of 500. The y-axis represents the number of regions in each bin that overlap with AR ChIP-seq enriched regions. Distribution of NSD score of **(c)** non-ESR1 (blue) and ESR1 overlapping (red) paired nucleosome regions in MCF-7 and **(d)** non-AR (blue) and AR overlapping (blue) paired nucleosome regions (red) in LNCaP cells. Wilcoxon test was performed to analyze the differences between ER and non-ER (p-value = 0.25), AR and non-AR (p-value=2.2e-16) paired nucleosome regions. Distribution of the distance between **(e)** ESR1 unique **(f)** ESR1/FOXA1 shared and **(g)** FOXA1 unique binding sites and the nearest H3K4me2 marked nucleosomes. The x-axis represents the distance from the center of positioned nucleosomes as determined by the NPS software. The y-axis represents numbers of ESR1 or FOXA1 binding sites within given distance ranges.

**a**

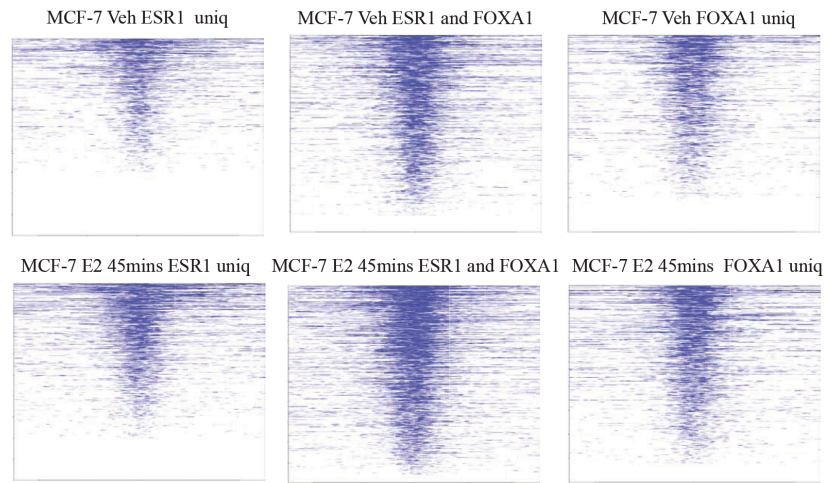

**b**

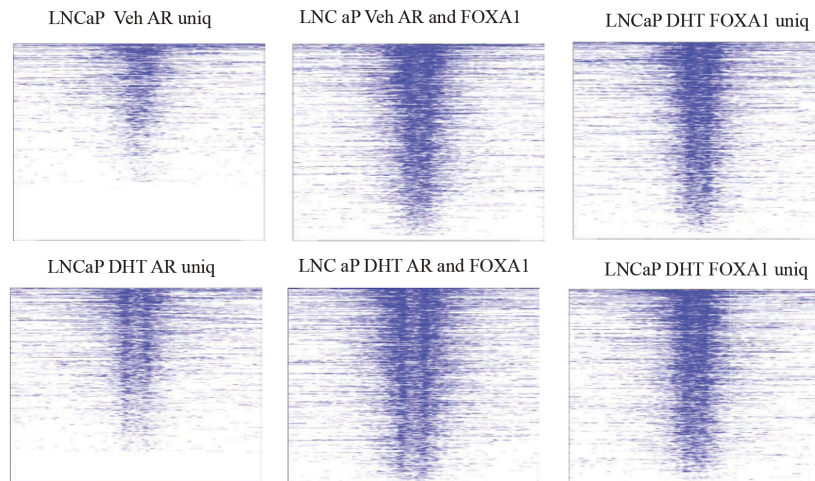

**c**

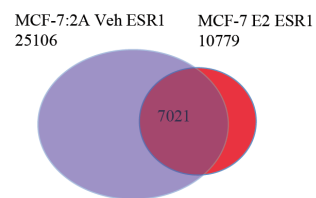

**d**

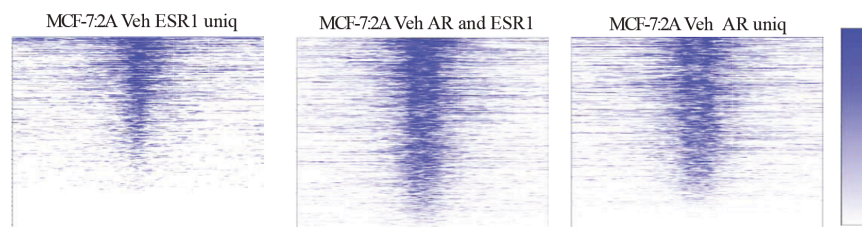

**Supplemental Figure 2. Mono-nucleosome level H3K4me2 ChIP-seq at nuclear receptor and FOXA1 binding loci in the (a) MCF-7, (b) LNCaP and (c), (d) MCF-7:2A cell lines.** (a) Top panel, the distribution of H3K4me2 signal centered on AR-unique, AR/FOXA1 shared and FOXA1-unique sites in the unstimulated condition. Bottom panel, distribution of H3K4me2 signal centered on the AR-unique, AR/FOXA1 shared and FOXA1-unique sites under conditions of androgen stimulation. (b) Top panel, distribution of H3K4me2 signal centered on ESR1-unique, ESR1/FOXA1 shared and FOXA1-unique sites in unstimulated cells. Bottom panel, distribution of H3K4me2 signal centered on ESR1-unique, ESR1/FOXA1 shared and FOXA1-unique sites in estrogen stimulated cells. (c) Venn diagram of MCF-7 ESR1 binding in relation to MCF-7:2A ESR1 binding. (d) Distribution of H3K4me2 signal centered on ESR1-unique, ESR1/AR shared and AR-unique sites in unstimulated cells.

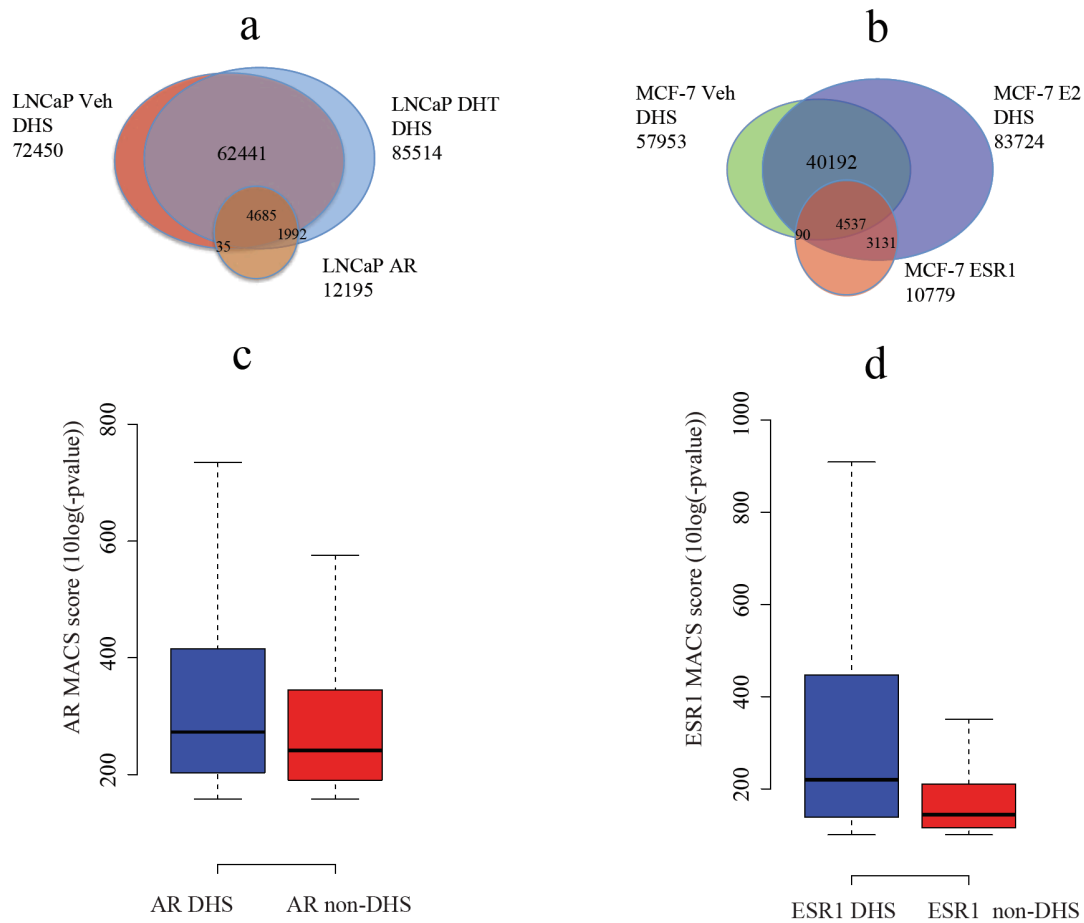

**Supplemental Figure 3. DNase I hypersensitivity sequencing in LNCaP and MCF-7.** (a) Venn diagram of DHS and AR peaks in LNCaP. DHS was identified at the sequencing depth of 50M for un-stimulated and 70M for androgen stimulated conditions. (b) Venn diagram of DHS and ESR1 peaks in MCF-7. DHS was identified at the sequencing depth of 28M for un-stimulated and 70M for estrogen stimulated conditions. (c) AR and (d) ESR1 binding level is measured by MACS p-value ( $-10\log(p\text{-value})$ ). “AR DHS” and “ESR1 DHS” represent the respective AR and ESR1 binding sites

overlapping with DHS; “AR non-DHS” and “ESR1 non-DHS” represent the AR and ESR1 binding sites not overlapping with DHS.

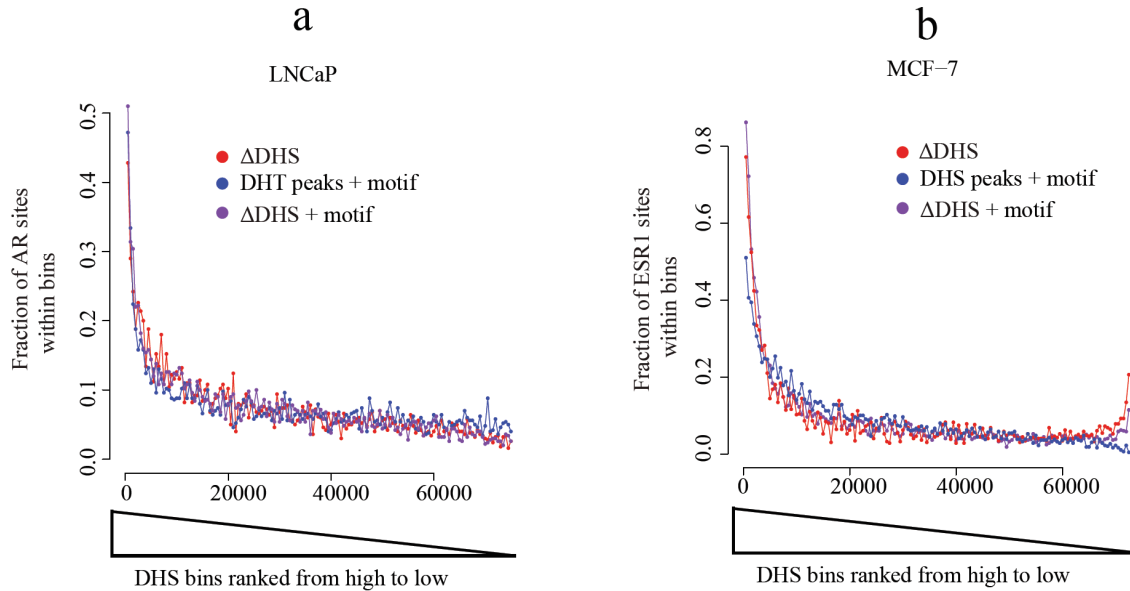

**Supplemental Figure 4. Characteristics of DNaseI hypersensitivity sequencing.** The fraction of **(a)** LNCaP AR and **(b)** MCF-7 ESR1 binding sites in bins of 500 DHS sites ranked by three measures:  $\Delta$ DHS, the change in DNaseI hypersensitivity between conditions, respective AR and ESR1 motifs in LNCaP and MCF-7 DHS under hormone stimulated conditions, and the combination of the two measures. For the combination of  $\Delta$ DHS and motif, the formula  $\sqrt{(\Delta\text{DHS rank}) \cdot (\text{motif rank})}$  was used. The regions are ranked by the respective statistics before grouping into bins of 500. The y-axis represents the number of regions in each bin that overlap with **(a)** AR and **(b)** ESR1 ChIP-seq enriched regions.

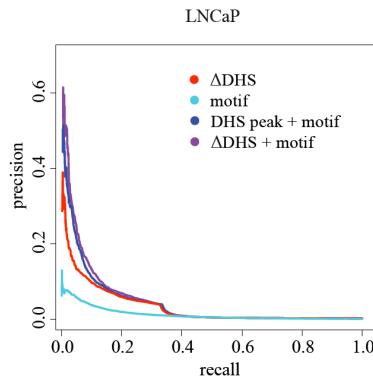

**Supplemental Figure 5. Precision-recall analysis of prediction power using DNase I hypersensitivity sequencing.** The precision-recall curves for prediction power of LNCaP AR binding sites were calculated by four measures:  $\Delta$ DHS, AR motif rank, AR motif in DHT DHS and  $\sqrt{(\Delta\text{DHS rank}) \cdot (\text{motif rank})}$ .

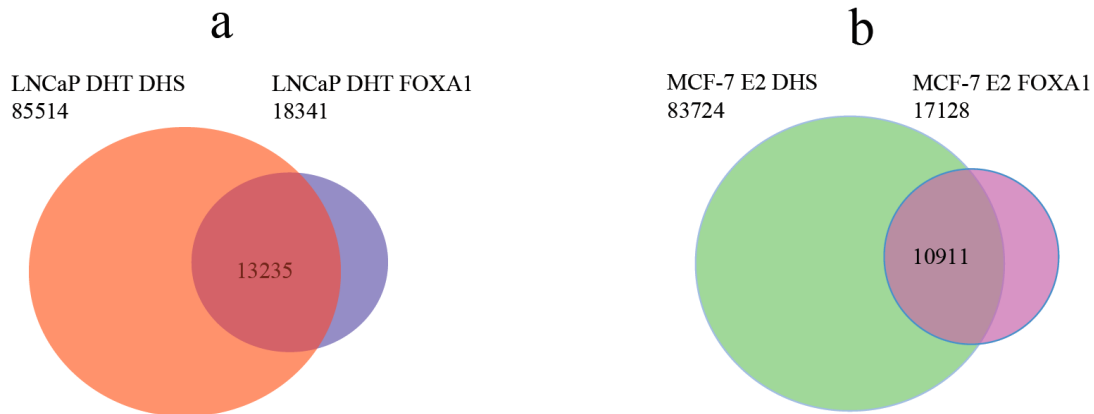

**Supplemental Figure 6. Overlap between DHS and FOXA1 in (a) LNCaP (b) and MCF-7.** MACS peak regions under hormone-stimulated conditions were used for comparison.

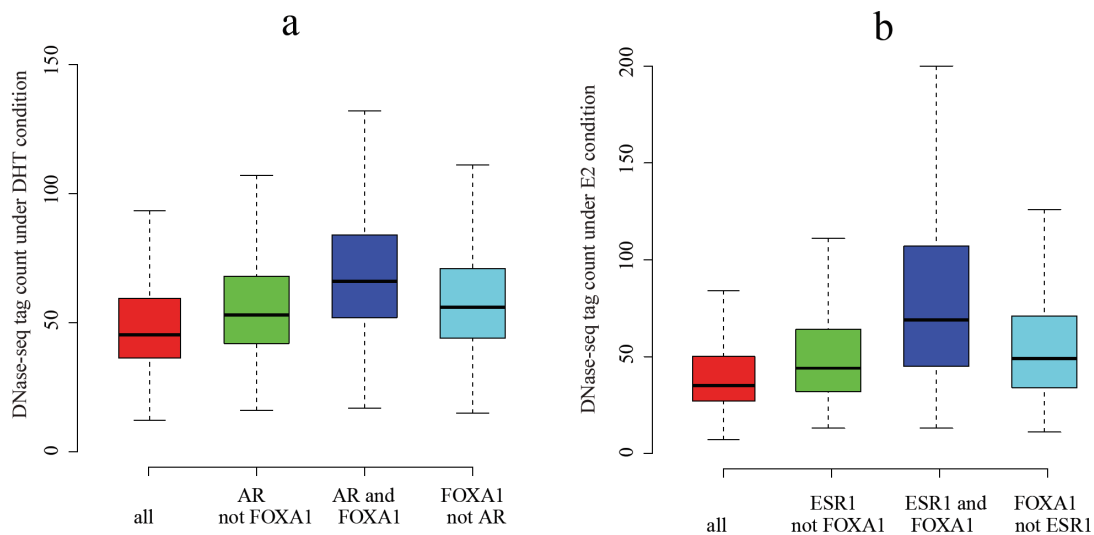

**Supplemental Figure 7. DNaseI-seq signal of (a) AR and FOXA1 and (b) ESR1 and FOXA1 subsets under hormone stimulated conditions.** “all” represents all the DHS sites in MCF-7 and LNCaP; “AR not FOXA1” and “ESR1 not FOXA1” represent AR and ESR1 binding sites that do not overlap with FOXA1; “AR and FOXA1” and “ESR1 and FOXA1” represent AR and ESR1 binding sites that overlap with FOXA1; “FOXA1 not AR” and “FOXA1 not ESR1” represents FOXA1 binding sites that do not overlap with AR and ESR1.

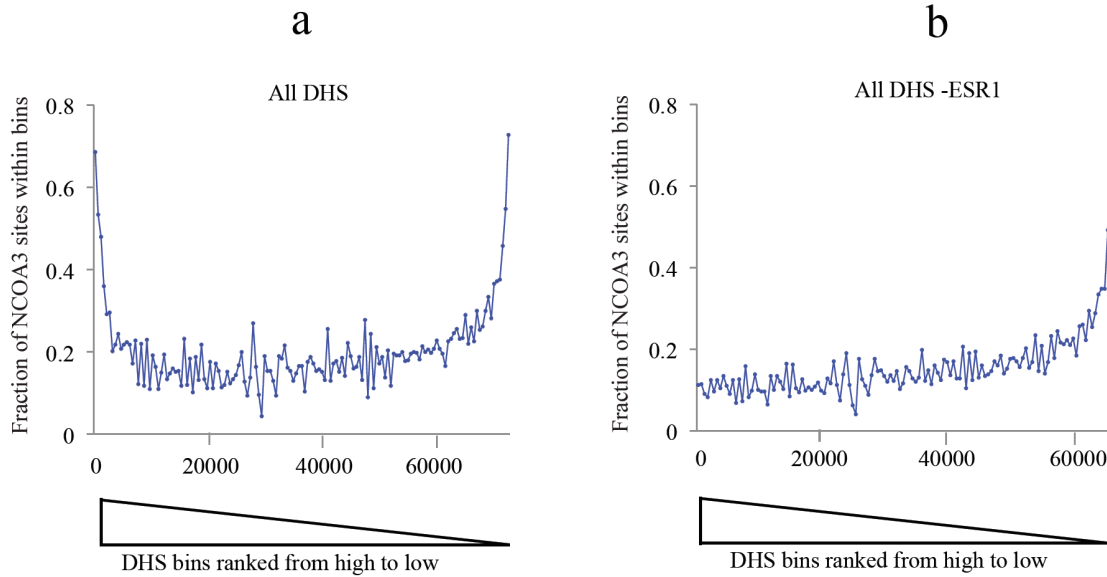

**Supplemental Figure 8. DNase I hypersensitivity changes at NCOA3 sites.** Association of  $\Delta$ DHS with NCOA3 sites in the presence (a) and absence (b) of ESR1 binding. MCF-7 DHS sites under the stimulated condition were ranked by decreasing  $\Delta$ DHS score. These ranked regions are grouped into bins of 500. The y-axis represents the fraction of regions that overlap with NCOA3 ChIP-seq enriched regions.

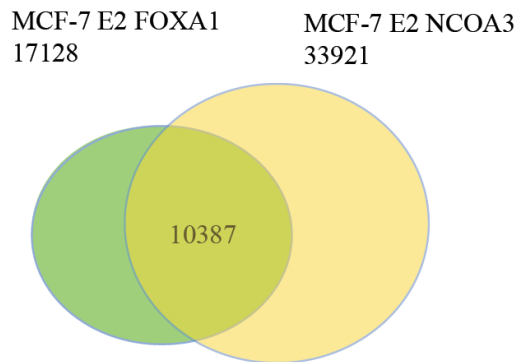

**Supplemental Figure 9. Overlap between FOXA1 and NCOA3 in MCF-7.** MACS peak regions under hormone-stimulated conditions were used for comparison. Venn diagram shows that 10387 out of the 17128 (61%) FOXA1 binding sites overlap with NCOA3 binding.

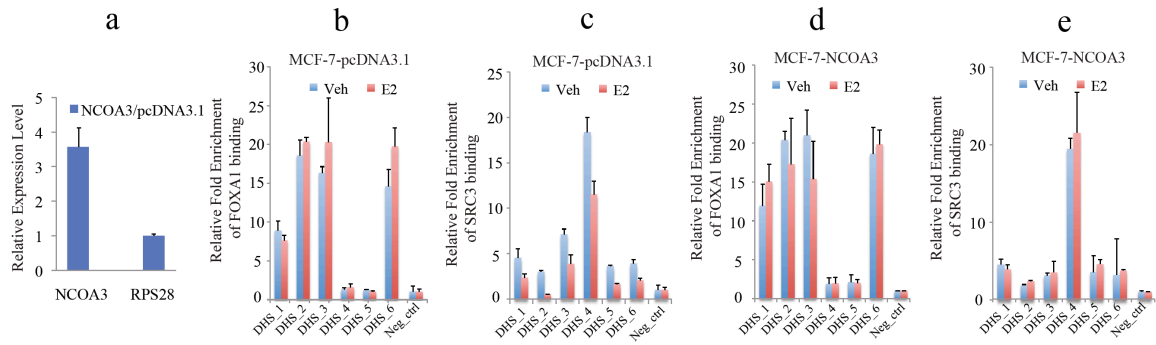

**Supplemental Figure 10. Overexpression of NCOA3 in MCF-7.** (a) RT-qPCR shows that the NCOA3 level in the NCOA3 overexpression sample is 3.5 fold higher than in the control sample which was transfected with empty pcDNA3.1 vector. The housekeeping gene RPS28 is used as an internal control. ChIP-qPCR of (b) FOXA1 and (c) NCOA3 in MCF-7 cells transfected with an empty pcDNA3.1 vector. ChIP-qPCR of (d) FOXA1 and (e) NCOA3 in MCF-7 cells transfected with an NCOA3 overexpression plasmid.

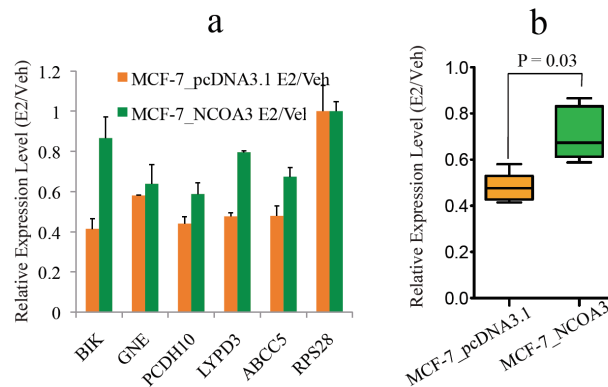

**Supplemental Figure 11. The effect of NCOA3 overexpression on estrogen down-regulated genes.** (a) Five genes that are down-regulated after 40 mins of estrogen stimulation (GRO-Seq data) were selected. RT-qPCR shows the fold changes of target gene expression after estrogen stimulation for 3 hours in the MCF-7 cells transfected with control plasmid and NCOA3 overexpression plasmid. (b). Box plots generated from RT-qPCR data of the 5 genes tested in (a). Overexpression of NCOA3 diminished the estrogen-induced down-regulation of target genes.

**Supplemental Table 1. Primers used for PCR.**

Primers used in Supplemental Figure 10

| NCOA3_ex |                      | NCOA3_exp |                       |
|----------|----------------------|-----------|-----------------------|
| p_F      | GAATCCCATGATGCAACACC | _R        | GCCATTCATGTGCACCATAC  |
| DHS_1_F  | CTTAGCCCAAAGCACCCAAT | DHS_1_R   | CACTCCAGCCTGGGCAAC    |
| DHS_2_F  | GGCTGTCTGCATCCTCTCAC | DHS_2_R   | CCAGCACCTTGGGTAAACAG  |
|          | AAACCTGCCAAGTCAGAAG  |           | CAGAGACAGCAAGAGAGAG   |
| DHS_3_F  | C                    | DHS_3_R   | AGAGA                 |
|          | GAAGTTTATTGCCATCACA  |           |                       |
| DHS_4_F  | GGT                  | DHS_4_R   | TTCCTGGACATCCTGTGAAAC |
|          | AGGGAACCATGATTGACAG  |           | TGGGTCATAATTGAAGAAA   |
| DHS_5_F  | C                    | DHS_5_R   | AATG                  |



|                                        |                      |              |                      |
|----------------------------------------|----------------------|--------------|----------------------|
| DHS_6_F                                | ACTCCACGAGCCCTGATTTT | DHS_6_R      | GCTTCTATTGGTGGACAAGC |
|                                        | CAACACCTTCCTGGTCCAGA |              | A                    |
| DHS_7_F                                | TAC                  | DHS_7_R      | AAGGGAAACAGAGATCATCT |
| Neg_ctrl_F                             | TCAGCTTTGACTGCCACCTA | Neg_ctrl_R   | GGAGT                |
| Primers used in Supplemental Figure 11 |                      |              |                      |
| BIK_exp_F                              | CTGCATCGGGGACGAGAT   | BIK_exp_R    | AGTGTGGTGAAACCGTCCAT |
| GNE_exp_F                              | ATCTCATCCAAGCTGCGAAA | GNE_exp_R    | GATCACAAGGGAGGGATTCA |
| PCDH10_exp_F                           | TACGGACACTGAGCACAAC  | PCDH10_exp_R | CTGTAACTCGGCGAGGTCT  |
| LYPD3_exp_F                            | ACAAGATGAAGACAGTGAA  | LYPD3_exp_R  | GAAGCCCGTGAAGATCCAG  |
| ABCC5_exp_F                            | ACTTCTCAGTGGGGGAACG  | ABCC5_exp_R  | CAGTCTGCAAATGCTTCTCG |
| RPS28_exp_F                            | CGATCCATCATCCGCAATG  | RPS28_exp_R  | AGCCAAGCTCAGCGCAAC   |
